# Supplementary material for: Electrical field assisted growth of poly(3-hexylthiophene) layers employing ionic liquids: microstructure elucidated by scanning force and electron microscopy
Source: Royal Society of Chemistry journal article supplement (doi:10.1039/c0jm00659a), 2010-01-01
Supplement: c0jm00659a.pdf [file c0jm00659a.pdf]

## Supporting Information

### **Electrical field assisted growth of poly(3-hexylthiophene) layers employing ionic liquids: Microstructure elucidated by scanning force and electron microscopy**

**Shahzada Ahmad\*, Rüdiger Berger, Hadayat Ullah Khan, Hans-Jürgen Butt**

Max Planck Institute for Polymer Research, Ackermannweg 10,  
D-55128 Mainz, Germany

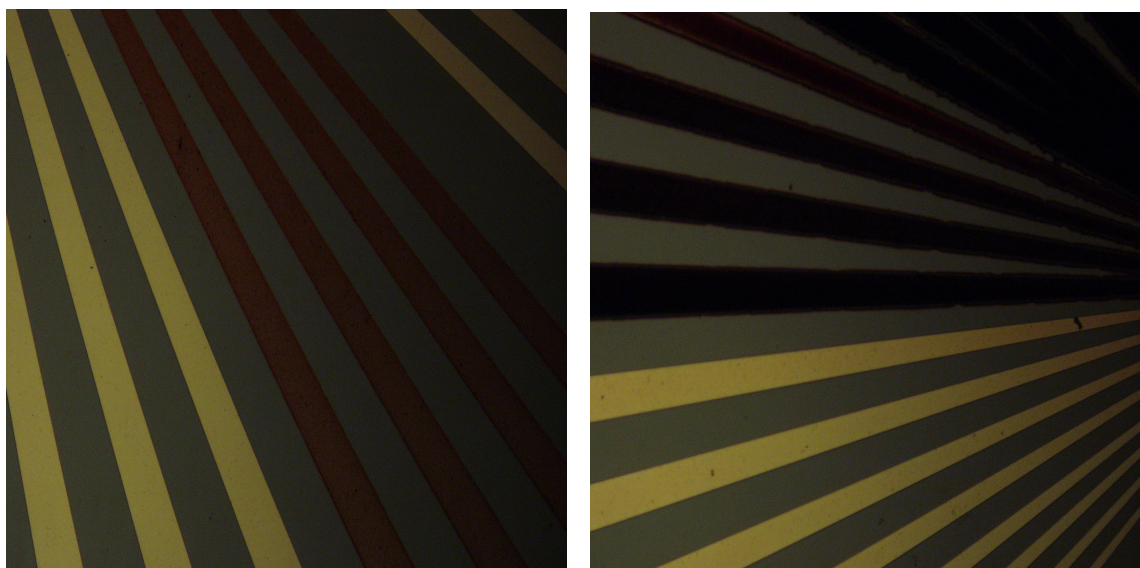

Fig.S1. Optical micrograph of electrodeposited uniform and adherent layers of P3HT (dark red) on gold electrode.

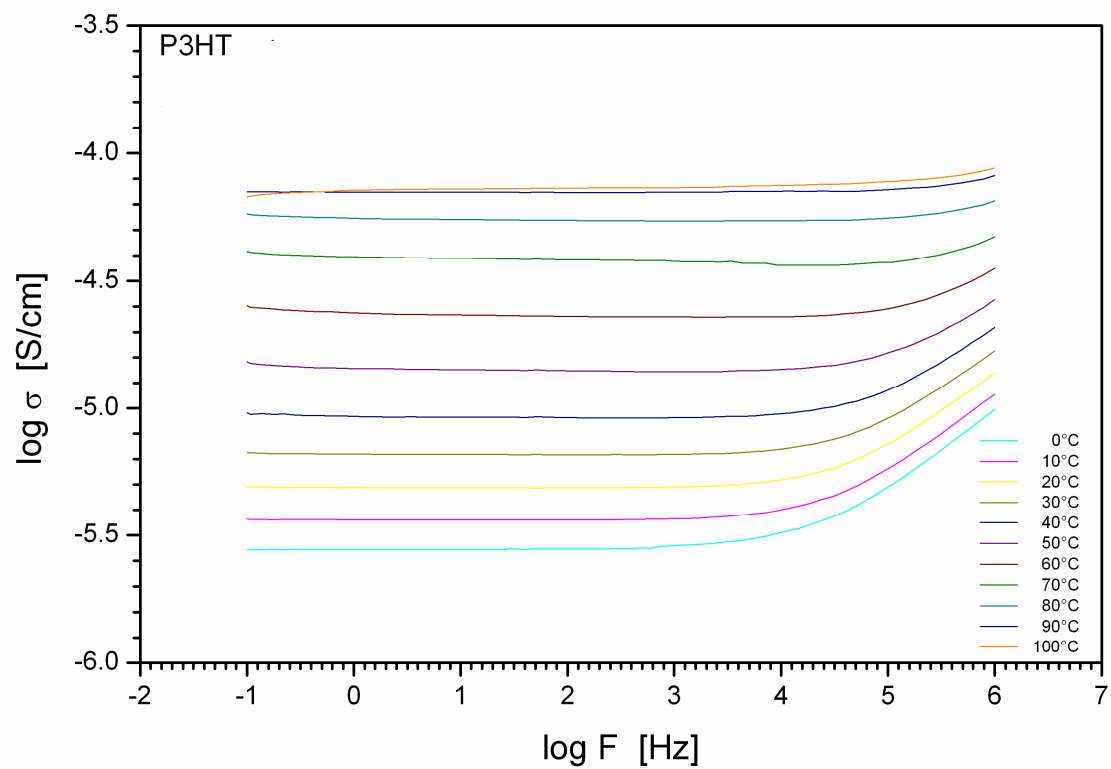

Figure S2. AC conductivity of electrodeposited P3HT as a function of frequency for different temperatures.

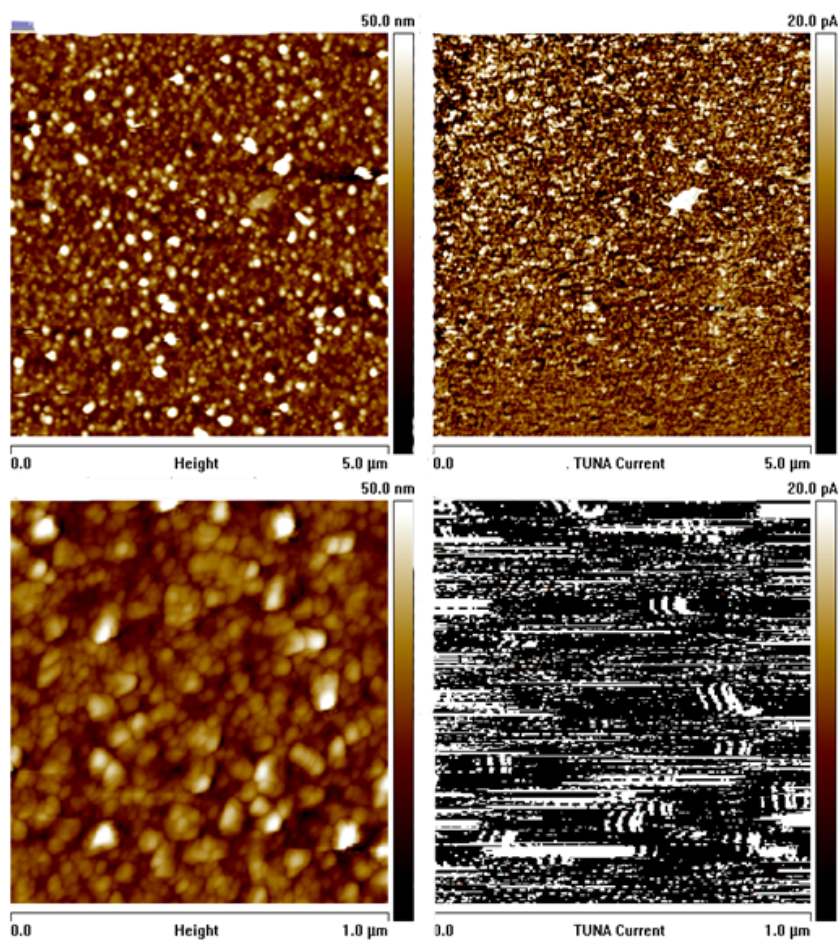

Figure S3 . SFM images of P3HT as-synthesized by applying the potential for 20 sec at 1.4 V (a) top left, height (b) right current images on a bias of 50mV and below the corresponding images obtained by subsequent electrochemical oxidation under potentiostatic conduction at 1.4V for 30 secs.
